# Supplementary material for: Poly(amino carbonate urethane)-based biodegradable, temperature and pH-sensitive injectable hydrogels for sustained human growth hormone delivery
Source: PubMed Central journal article supplement (PMC4951706; doi:10.1038/srep29978), 2016-07-20
Supplement: srep29978-s1.pdf [file srep29978-s1.pdf]

(Supplementary Information for *Scientific Reports*)

**Poly(amino carbonate urethane)-based biodegradable, temperature and pH-sensitive injectable hydrogels for sustained human growth hormone delivery**

V.H. Giang Phan,<sup>1</sup> Thavasyappan Thambi,<sup>1</sup> Huu Thuy Trang Duong and Doo Sung Lee\*

School of Chemical Engineering, Theranostic Macromolecules Research Center,

Sungkyunkwan University, Suwon, Republic of Korea

<sup>1</sup>These authors contributed equally contributed to this paper.

\*Corresponding author:

Doo Sung Lee, Ph.D.

Tel.: +82-31-290-7282; Fax: 82-31-292-8790; e-mail: [dslee@skku.edu](mailto:dslee@skku.edu)

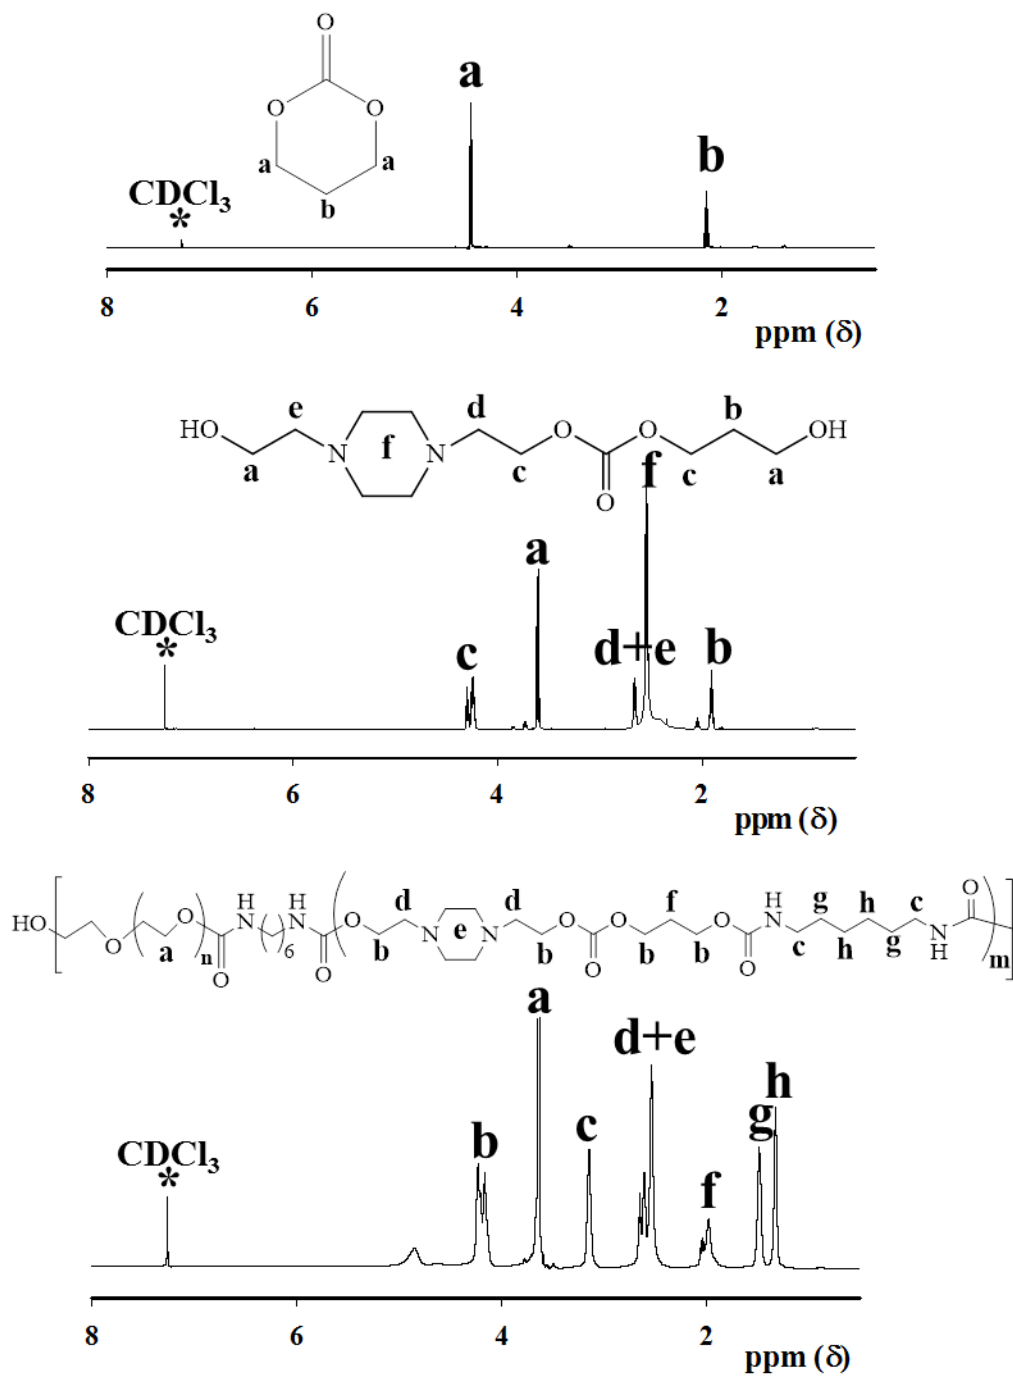

**Fig. S1.**  $^1\text{H}$  NMR spectra of TMC and HEP-TMC monomers and PEG-PACU copolymers. Asterisks (\*) indicates the residual solvent peak  $\text{CDCl}_3$ .

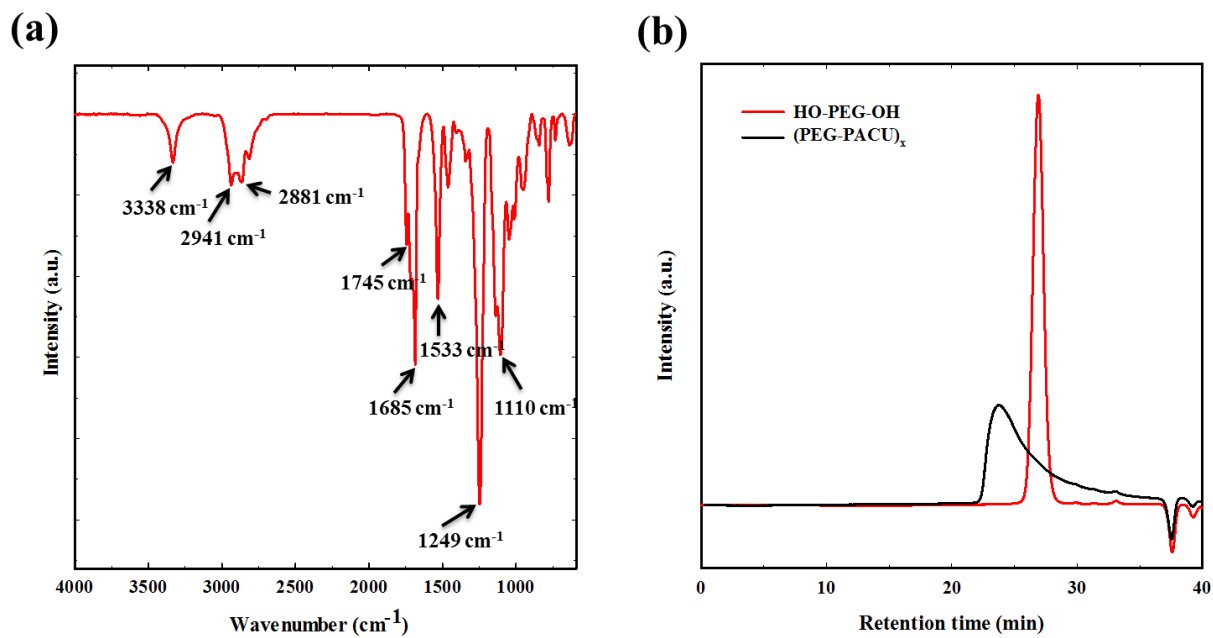

**Fig. S2.** (a) FT-IR spectra of PEG-PACU copolymers. (b) GPC trace of PEG-PACU copolymers. PEG was used as a standard.

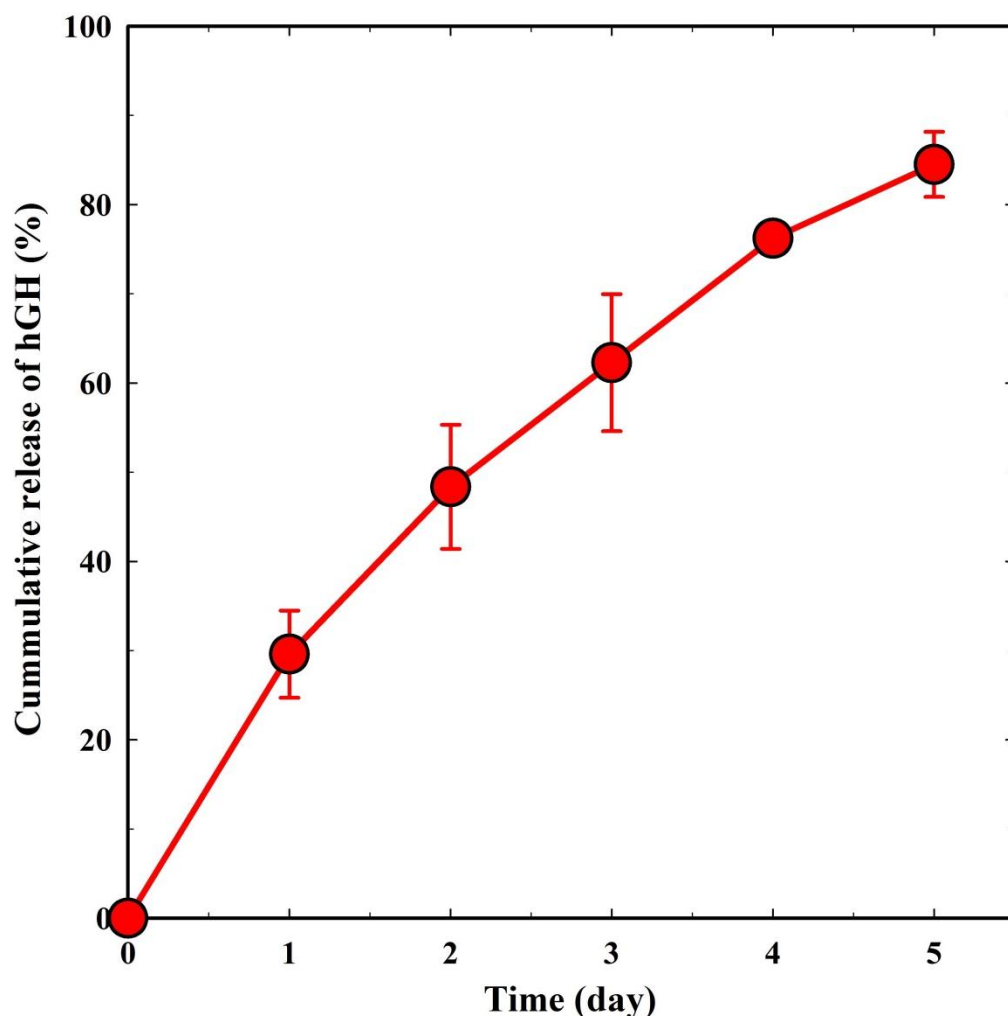

**Fig. S3.** In vitro release of hGH from PEG-PACU hydrogels (20 wt%) at a hGH concentration of 1 mg/ml. The error bars in the graph represent standard deviations (n=3).

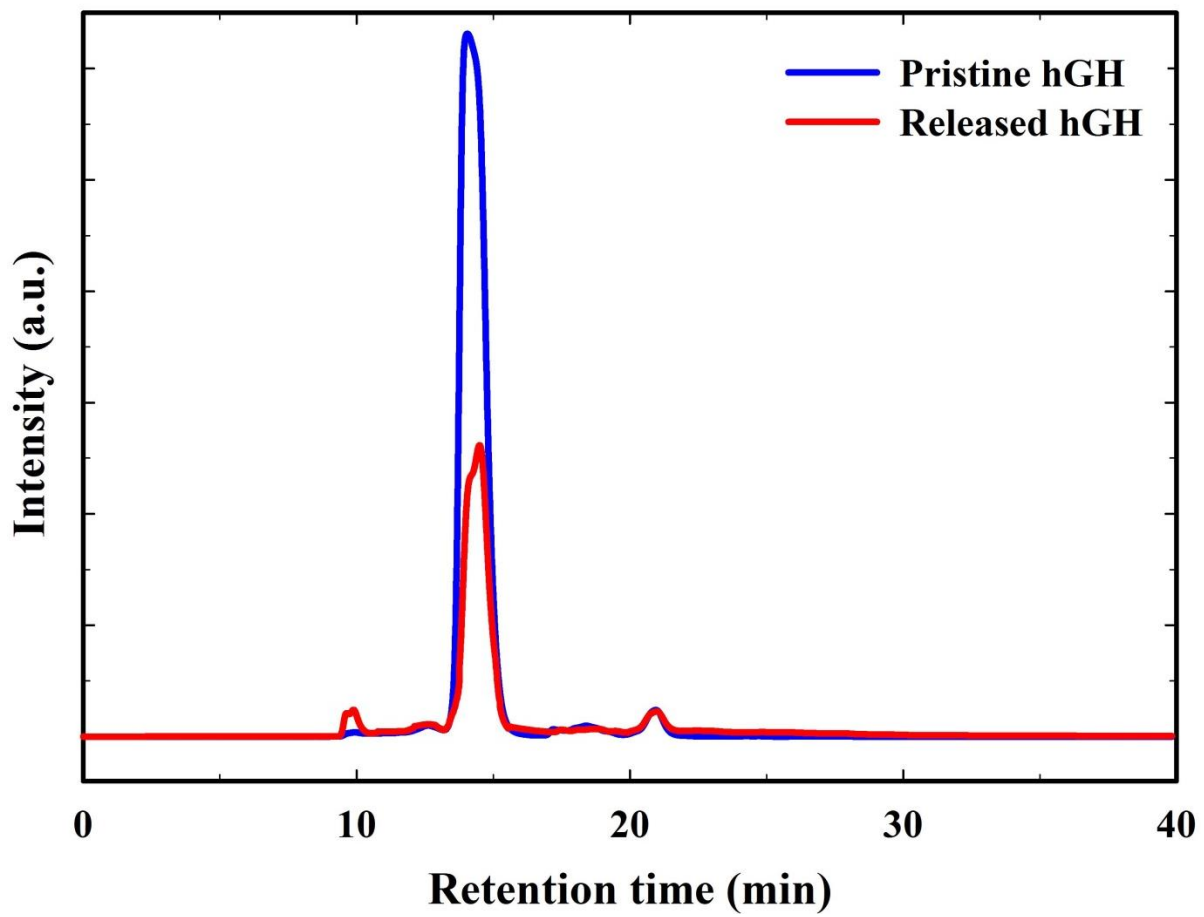

**Fig. S4.** HPLC chromatogram of pristine hGH and released hGH.

**Table S1.** Pharmacokinetic characteristics of hGH solution and hGH-loaded injectable hydrogels.

| Formulation                   | T <sub>max</sub> (h) | C <sub>max</sub> (ng/mL) | AUC (ng.h/mL) |
|-------------------------------|----------------------|--------------------------|---------------|
| hGH solution                  | 8                    | 70.4                     | 412           |
| hGH-loaded PEG-PACU hydrogels | 12                   | 32.5                     | 908           |
